# Supplementary material for: Thermotropic Optical Response of Silicone–Paraffin Flexible Blends
Source: MDPI journal article supplement (doi:10.3390/polym14235117), 2022-11-24
Supplement: s1 [file s1]

# Thermotropic optical response of silicone-paraffin flexible blends

Giulia Fredi\*, Matteo Favaro, Damiano Da Ros, Alessandro Pegoretti, and Andrea Dorigato

## Supplementary materials

**Table S1.** Results of the ANOVA test on the values of elastic modulus, UTS, and strain at break. The differences are considered significant with  $Pr < 0.05$  (confidence level 95 %). The considered parameters are the content of paraffin (0 or 5 wt%), the content of CTAB (0, 3, 5, or 10 phr with respect to paraffin), and the testing temperature (23 or 60 °C).

| Elastic modulus |         |         |         |           |     |
|-----------------|---------|---------|---------|-----------|-----|
|                 | Sum sq  | Mean sq | F value | Pr (>F)   |     |
| paraffin        | 0.02712 | 0.02712 | 16.908  | 2.094E-4  | *** |
| CTAB            | 0.05165 | 0.05165 | 32.2018 | 1.732E-6  | *** |
| T               | 5.15E-4 | 5.15E-4 | 0.3213  | 0.57425   |     |
| paraffin:T      | 0.02018 | 0.02018 | 12.5809 | 0.00108   | **  |
| CTAB:T          | 0.09939 | 0.09939 | 61.9661 | 2.02E-9   | *** |
| Residuals       | 0.05935 | 0.0016  |         |           |     |
| UTS             |         |         |         |           |     |
|                 | Sum sq  | Mean sq | F value | Pr (>F)   |     |
| paraffin        | 2.328   | 2.328   | 25.9192 | 1.064E-5  | *** |
| CTAB            | 0.0084  | 0.0084  | 0.0932  | 0.7619    |     |
| T               | 0.0367  | 0.0367  | 0.4083  | 0.5268    |     |
| paraffin:T      | 5.2     | 5.2     | 57.8945 | 4.448E-9  | *** |
| CTAB:T          | 3.0291  | 3.0291  | 33.7243 | 1.145E-6  | *** |
| Residuals       | 3.3233  | 0.0898  |         |           |     |
| Strain at break |         |         |         |           |     |
|                 | Sum sq  | Mean sq | F value | Pr (>F)   |     |
| paraffin        | 1.86728 | 1.86728 | 88.6622 | 2.304E-11 | *** |
| CTAB            | 0.66162 | 0.66162 | 31.4152 | 2.153E-6  | *** |
| T               | 0.01615 | 0.01615 | 0.7669  | 0.38683   |     |
| paraffin:T      | 0.51197 | 0.51197 | 24.3093 | 1.749E-5  | *** |
| CTAB:T          | 0.09173 | 0.09173 | 4.3554  | 0.04384   | *   |
| Residuals       | 0.77924 | 0.02106 |         |           |     |

Signif. codes: 0 '\*\*\*' 0.001 '\*\*' 0.01 '\*' 0.05 '.' 0.1 ' ' 1

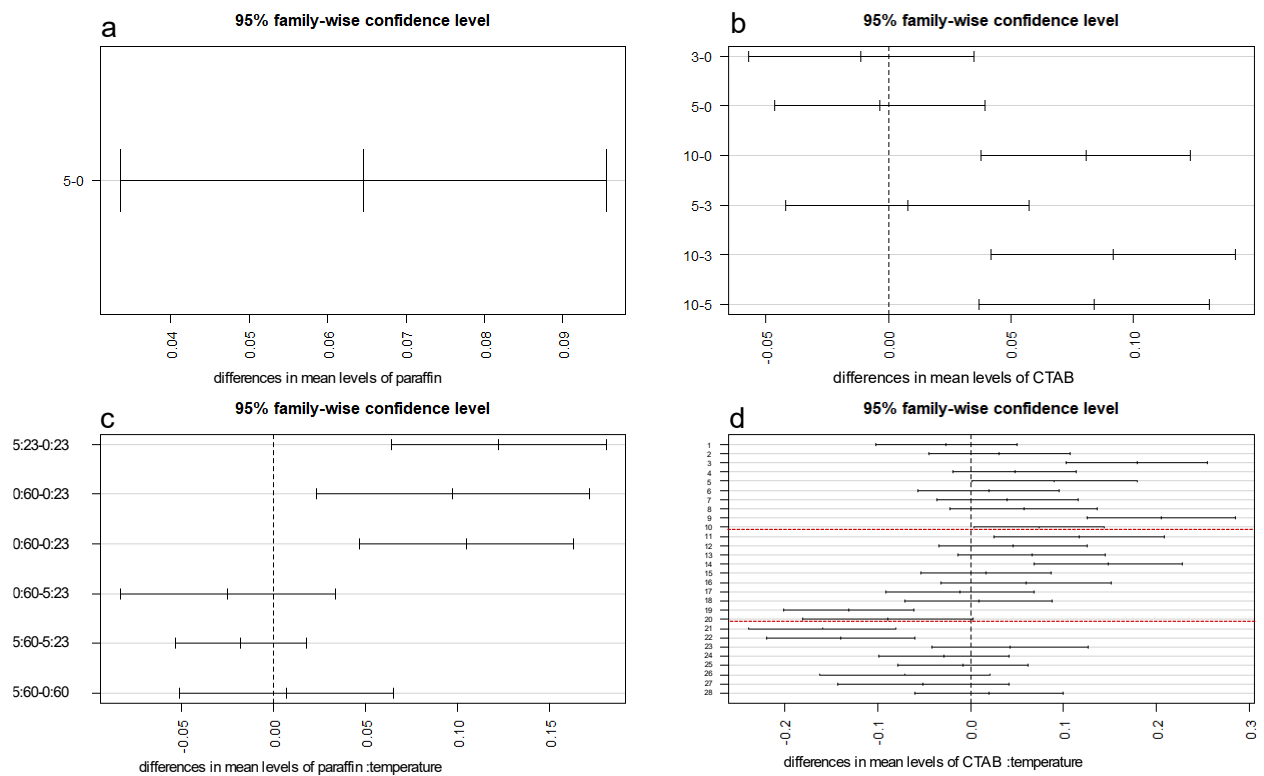

**Figure S1:** Results of Tukey's test for the values of the elastic modulus. Only the parameters found significant in the ANOVA test are reported. The pairs with the bar not crossing the 0 show a significant difference. (a) differences in the mean levels of paraffin; (b) differences in the mean levels of CTAB; (c) differences in the mean levels of paraffin:temperature; (d) Differences in the mean levels of CTAB:temperature. Data are in the following order: 1 = 3:23-0:23; 2 = 5:23-0:23; 3 = 10:23-0:23; 4 = 0:60-0:23; 5 = 3:60-0:23; 6 = 5:60-0:23; 7 = 10:60-0:23; 8 = 5:23-3:23; 9 = 10:23-3:23; 10 = 0:60-3:23; 11 = 3:60-3:23; 12 = 5:60-3:23; 13 = 10:60-3:23; 14 = 10:23-5:23; 15 = 0:60-5:23; 16 = 3:60-5:23; 17 = 5:60-5:23; 18 = 10:60-5:23; 19 = 0:60-10:23; 20 = 3:60-10:23; 21 = 5:60-10:23; 22 = 10:60-10:23; 23 = 3:60-0:60; 24 = 5:60-0:60; 25 = 10:60-0:60; 26 = 5:60-3:60; 27 = 10:60-3:60; 28 = 10:60-5:60.

**Table S2:** Results of Tukey's test for the elastic modulus. Pairs are considered significantly different with a  $p_{adj} < 0.05$  (confidence level 95 %).

| <i>paraffin</i>             |             |            |            |              |
|-----------------------------|-------------|------------|------------|--------------|
|                             | <i>diff</i> | <i>lwr</i> | <i>upr</i> | <i>p_adj</i> |
| 5-0                         | 0.06454     | 0.03354    | 0.09553    | 1.711E-4     |
| <i>CTAB</i>                 |             |            |            |              |
|                             | <i>diff</i> | <i>lwr</i> | <i>upr</i> | <i>p_adj</i> |
| 3-0                         | -0.01117    | -0.0572    | 0.03486    | 0.91258      |
| 5-0                         | -0.00342    | -0.04635   | 0.03951    | 0.9964       |
| 10-0                        | 0.08058     | 0.03765    | 0.12351    | 8.34E-5      |
| 5-3                         | 0.00775     | -0.04213   | 0.05763    | 0.97461      |
| 10-3                        | 0.09175     | 0.04187    | 0.14163    | 1.122E-4     |
| 10-5                        | 0.084       | 0.03698    | 0.13102    | 1.706E-4     |
| <i>temperature</i>          |             |            |            |              |
|                             | <i>diff</i> | <i>lwr</i> | <i>upr</i> | <i>p_adj</i> |
| 60-23                       | 0.00371     | -0.02042   | 0.02783    | 0.75661      |
| <i>Paraffin:temperature</i> |             |            |            |              |

|                         | <i>diff</i> | <i>lwr</i> | <i>upr</i> | <i>p_adj</i> |
|-------------------------|-------------|------------|------------|--------------|
| 5:23-0:23               | 0.12241     | 0.06398    | 0.18085    | 1.48E-5      |
| 0:60-0:23               | 0.0975      | 0.02315    | 0.17185    | 0.00624      |
| 5:60-0:23               | 0.10466     | 0.04654    | 0.16279    | 1.523E-4     |
| 0:60-5:23               | -0.02491    | -0.08335   | 0.03352    | 0.65979      |
| 5:60-5:23               | -0.01775    | -0.05331   | 0.01781    | 0.53865      |
| 5:60-0:60               | 0.00716     | -0.05096   | 0.06529    | 0.98699      |
| <b>CTAB:temperature</b> |             |            |            |              |
|                         | <i>diff</i> | <i>lwr</i> | <i>upr</i> | <i>p_adj</i> |
| 3:23-0:23               | -0.02632    | -0.10242   | 0.04977    | 0.94807      |
| 5:23-0:23               | 0.03086     | -0.04524   | 0.10695    | 0.8882       |
| 10:23-0:23              | 0.17886     | 0.10276    | 0.25495    | 3E-7         |
| 0:60-0:23               | 0.04759     | -0.01864   | 0.11382    | 0.31198      |
| 3:60-0:23               | 0.09023     | 0.00137    | 0.17909    | 0.04446      |
| 5:60-0:23               | 0.01941     | -0.05668   | 0.09551    | 0.99036      |
| 10:60-0:23              | 0.03941     | -0.03668   | 0.11551    | 0.70287      |
| 5:23-3:23               | 0.05718     | -0.0223    | 0.13666    | 0.31045      |
| 10:23-3:23              | 0.20518     | 0.1257     | 0.28466    | 0            |
| 0:60-3:23               | 0.07391     | 0.00382    | 0.144      | 0.03284      |
| 3:60-3:23               | 0.11655     | 0.02478    | 0.20833    | 0.00543      |
| 5:60-3:23               | 0.04573     | -0.03374   | 0.12521    | 0.58595      |
| 10:60-3:23              | 0.06573     | -0.01374   | 0.14521    | 0.16668      |
| 10:23-5:23              | 0.148       | 0.06852    | 0.22748    | 2.32E-5      |
| 0:60-5:23               | 0.01673     | -0.05336   | 0.08682    | 0.99351      |
| 3:60-5:23               | 0.05937     | -0.0324    | 0.15115    | 0.4408       |
| 5:60-5:23               | -0.01145    | -0.09092   | 0.06803    | 0.99974      |
| 10:60-5:23              | 0.00855     | -0.07092   | 0.08803    | 0.99996      |
| 0:60-10:23              | -0.13127    | -0.20136   | -0.06118   | 2.1E-5       |
| 3:60-10:23              | -0.08863    | -0.1804    | 0.00315    | 0.06455      |
| 5:60-10:23              | -0.15945    | -0.23892   | -0.07997   | 6E-6         |
| 10:60-10:23             | -0.13945    | -0.21892   | -0.05997   | 6.37E-5      |
| 3:60-0:60               | 0.04264     | -0.04114   | 0.12642    | 0.72025      |
| 5:60-0:60               | -0.02818    | -0.09827   | 0.04191    | 0.89253      |
| 10:60-0:60              | -0.00818    | -0.07827   | 0.06191    | 0.99994      |
| 5:60-3:60               | -0.07082    | -0.16259   | 0.02095    | 0.23284      |
| 10:60-3:60              | -0.05082    | -0.14259   | 0.04095    | 0.6307       |
| 10:60-5:60              | 0.02        | -0.05948   | 0.09948    | 0.99111      |

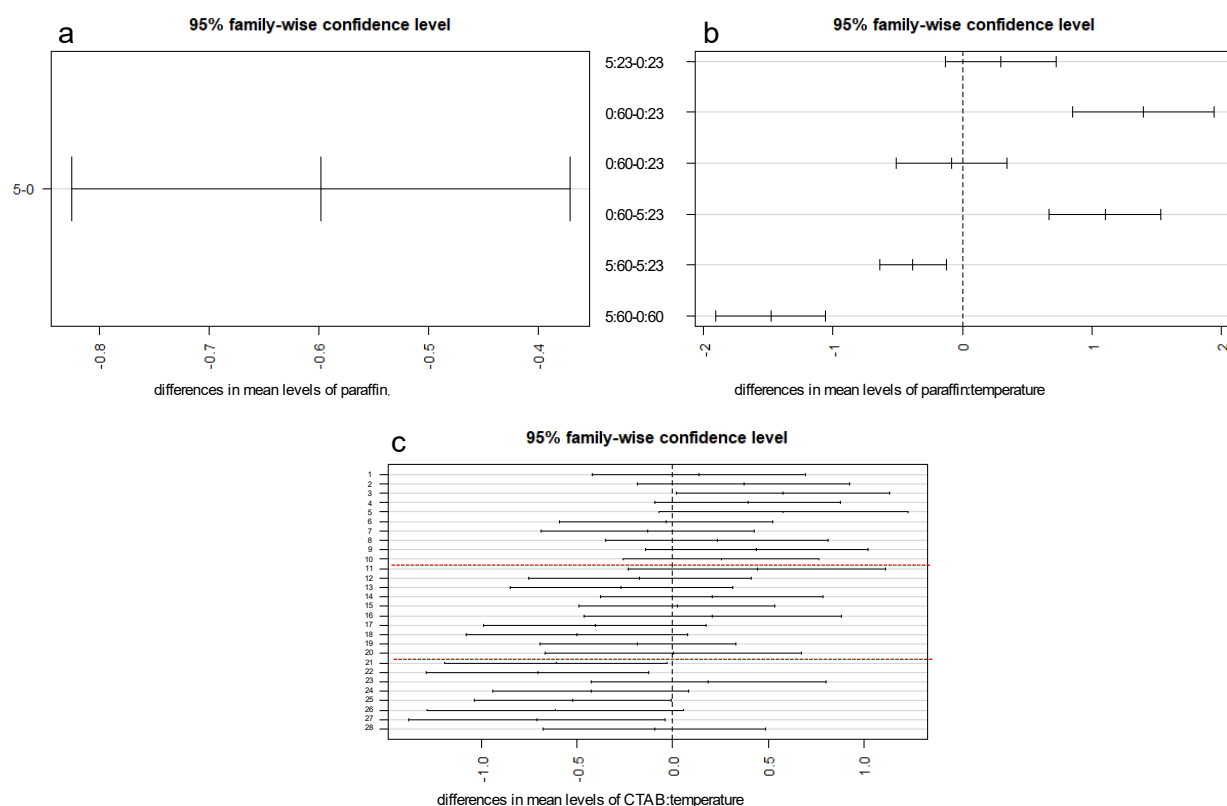

**Figure S2:** Results of the Tukey test for the values of the UTS. Only the parameters found significant in the ANOVA test are reported. The pairs with the bar not crossing the 0 show a significant difference. (a) differences in the mean levels of paraffin; (b) differences in the mean levels of paraffin:temperature; (c) Differences in the mean levels of CTAB:temperature. Data are in the following order: 1 = 3:23-0:23; 2 = 5:23-0:23; 3 = 10:23-0:23; 4 = 0:60-0:23; 5 = 3:60-0:23; 6 = 5:60-0:23; 7 = 10:60-0:23; 8 = 5:23-3:23; 9 = 10:23-3:23; 10 = 0:60-3:23; 11 = 3:60-3:23; 12 = 5:60-3:23; 13 = 10:60-3:23; 14 = 10:23-5:23; 15 = 0:60-5:23; 16 = 3:60-5:23; 17 = 5:60-5:23; 18 = 10:60-5:23; 19 = 0:60-10:23; 20 = 3:60-10:23; 21 = 5:60-10:23; 22 = 10:60-10:23; 23 = 3:60-0:60; 24 = 5:60-0:60; 25 = 10:60-0:60; 26 = 5:60-3:60; 27 = 10:60-3:60; 28 = 10:60-5:60.

**Table S3:** Results of Tukey's test for the UTS. Pairs are considered significantly different with a  $p_{adj} < 0.05$  (confidence level 95 %).

| paraffin             |          |          |          |         |
|----------------------|----------|----------|----------|---------|
|                      | diff     | lwr      | upr      | p_adj   |
| 5-0                  | -0.59793 | -0.82499 | -0.37087 | 6.4E-6  |
| CTAB                 |          |          |          |         |
|                      | diff     | lwr      | upr      | p_adj   |
| 3-0                  | 0.06831  | -0.26895 | 0.40557  | 0.94646 |
| 5-0                  | -0.06744 | -0.38193 | 0.24706  | 0.93738 |
| 10-0                 | -0.01244 | -0.32693 | 0.30206  | 0.99955 |
| 5-3                  | -0.13575 | -0.50116 | 0.22966  | 0.74765 |
| 10-3                 | -0.08075 | -0.44616 | 0.28466  | 0.93202 |
| 10-5                 | 0.055    | -0.28951 | 0.39951  | 0.97257 |
| temperature          |          |          |          |         |
|                      | diff     | lwr      | upr      | p_adj   |
| 60-23                | -0.05091 | -0.22768 | 0.12586  | 0.56191 |
| paraffin:temperature |          |          |          |         |

|                         | <i>diff</i> | <i>lwr</i> | <i>upr</i> | <i>p_adj</i> |
|-------------------------|-------------|------------|------------|--------------|
| 5:23-0:23               | 0.29586     | -0.13223   | 0.72396    | 0.26052      |
| 0:60-0:23               | 1.395       | 0.85028    | 1.93972    | 4E-7         |
| 5:60-0:23               | -0.08582    | -0.51164   | 0.34001    | 0.94721      |
| 0:60-5:23               | 1.09914     | 0.67104    | 1.52723    | 4E-7         |
| 5:60-5:23               | -0.38168    | -0.64221   | -0.12115   | 0.00202      |
| 5:60-0:60               | -1.48082    | -1.90664   | -1.05499   | 0            |
| <b>CTAB:temperature</b> |             |            |            |              |
|                         | <i>diff</i> | <i>lwr</i> | <i>upr</i> | <i>p_adj</i> |
| 3:23-0:23               | 0.13884     | -0.41865   | 0.69633    | 0.99164      |
| 5:23-0:23               | 0.37124     | -0.18625   | 0.92874    | 0.40451      |
| 10:23-0:23              | 0.57724     | 0.01975    | 1.13474    | 0.03811      |
| 0:60-0:23               | 0.39346     | -0.09178   | 0.87869    | 0.18436      |
| 3:60-0:23               | 0.58029     | -0.07072   | 1.23131    | 0.10934      |
| 5:60-0:23               | -0.03397    | -0.59147   | 0.52352    | 1            |
| 10:60-0:23              | -0.12997    | -0.68747   | 0.42752    | 0.99437      |
| 5:23-3:23               | 0.2324      | -0.34988   | 0.81469    | 0.89602      |
| 10:23-3:23              | 0.4384      | -0.14388   | 1.02069    | 0.25904      |
| 0:60-3:23               | 0.25461     | -0.25891   | 0.76814    | 0.74525      |
| 3:60-3:23               | 0.44145     | -0.23091   | 1.11382    | 0.42222      |
| 5:60-3:23               | -0.17281    | -0.7551    | 0.40947    | 0.97706      |
| 10:60-3:23              | -0.26881    | -0.8511    | 0.31347    | 0.80586      |
| 10:23-5:23              | 0.206       | -0.37628   | 0.78828    | 0.94181      |
| 0:60-5:23               | 0.02221     | -0.49131   | 0.53574    | 1            |
| 3:60-5:23               | 0.20905     | -0.46331   | 0.88141    | 0.97039      |
| 5:60-5:23               | -0.40521    | -0.9875    | 0.17707    | 0.35016      |
| 10:60-5:23              | -0.50121    | -1.0835    | 0.08107    | 0.1342       |
| 0:60-10:23              | -0.18379    | -0.69731   | 0.32974    | 0.93835      |
| 3:60-10:23              | 0.00305     | -0.66931   | 0.67541    | 1            |
| 5:60-10:23              | -0.61121    | -1.1935    | -0.02893   | 0.0341       |
| 10:60-10:23             | -0.70721    | -1.2895    | -0.12493   | 0.00878      |
| 3:60-0:60               | 0.18684     | -0.42694   | 0.80062    | 0.97362      |
| 5:60-0:60               | -0.42743    | -0.94095   | 0.0861     | 0.16124      |
| 10:60-0:60              | -0.52343    | -1.03695   | -0.0099    | 0.04317      |
| 5:60-3:60               | -0.61426    | -1.28663   | 0.0581     | 0.0938       |
| 10:60-3:60              | -0.71026    | -1.38263   | -0.0379    | 0.03235      |
| 10:60-5:60              | -0.096      | -0.67828   | 0.48628    | 0.99937      |

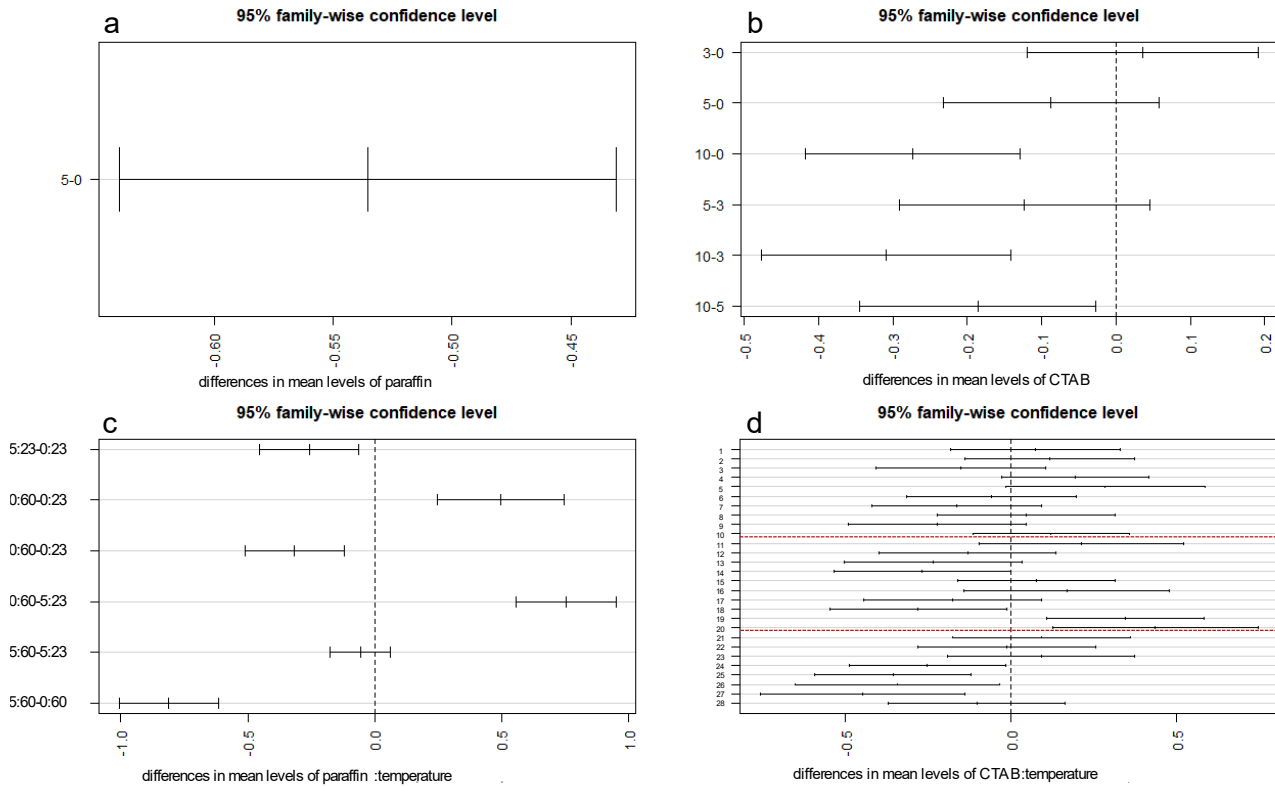

**Figure S3:** Results of Tukey's test for the values of the strain at break. Only the parameters found significant in the ANOVA test are reported. The pairs with the bar not crossing the 0 show a significant difference. (a) differences in the mean levels of paraffin; (b) differences in the mean levels of CTAB; (c) differences in the mean levels of paraffin:temperature; (d) Differences in the mean levels of CTAB:temperature. Data are in the following order: 1 = 3:23-0:23; 2 = 5:23-0:23; 3 = 10:23-0:23; 4 = 0:60-0:23; 5 = 3:60-0:23; 6 = 5:60-0:23; 7 = 10:60-0:23; 8 = 5:23-3:23; 9 = 10:23-3:23; 10 = 0:60-3:23; 11 = 3:60-3:23; 12 = 5:60-3:23; 13 = 10:60-3:23; 14 = 10:23-5:23; 15 = 0:60-5:23; 16 = 3:60-5:23; 17 = 5:60-5:23; 18 = 10:60-5:23; 19 = 0:60-10:23; 20 = 3:60-10:23; 21 = 5:60-10:23; 22 = 10:60-10:23; 23 = 3:60-0:60; 24 = 5:60-0:60; 25 = 10:60-0:60; 26 = 5:60-3:60; 27 = 10:60-3:60; 28 = 10:60-5:60.

**Table S4:** Results of Tukey's test for the UTS. Pairs are considered significantly different with a  $p_{adj} < 0.05$  (confidence level 95 %).

| paraffin             |          |          |          |          |
|----------------------|----------|----------|----------|----------|
|                      | diff     | lwr      | upr      | p_adj    |
| 5-0                  | -0.5355  | -0.63986 | -0.43114 | 0        |
| CTAB                 |          |          |          |          |
|                      | diff     | lwr      | upr      | p_adj    |
| 3-0                  | 0.03593  | -0.11907 | 0.19094  | 0.92262  |
| 5-0                  | -0.08707 | -0.23161 | 0.05748  | 0.37666  |
| 10-0                 | -0.27307 | -0.41761 | -0.12852 | 7.59E-5  |
| 5-3                  | -0.123   | -0.29094 | 0.04494  | 0.2156   |
| 10-3                 | -0.309   | -0.47694 | -0.14106 | 1.119E-4 |
| 10-5                 | -0.186   | -0.34434 | -0.02766 | 0.01617  |
| temperature          |          |          |          |          |
|                      | diff     | lwr      | upr      | p_adj    |
| 60-23                | 0.04554  | -0.0357  | 0.12678  | 0.26232  |
| paraffin:temperature |          |          |          |          |
|                      | diff     | lwr      | upr      | p_adj    |

|                         |             |            |             |              |
|-------------------------|-------------|------------|-------------|--------------|
| 5:23-0:23               | -0.25855    | -0.4553    | -0.06179    | 0.00612      |
| 0:60-0:23               | 0.495       | 0.24464    | 0.74536     | 3.78E-5      |
| 5:60-0:23               | -0.31582    | -0.51153   | -0.12011    | 6.539E-4     |
| 0:60-5:23               | 0.75355     | 0.55679    | 0.9503      | 0            |
| 5:60-5:23               | -0.05727    | -0.17701   | 0.06247     | 0.5733       |
| 5:60-0:60               | -0.81082    | -1.00653   | -0.61511    | 0            |
| <b>CTAB:temperature</b> |             |            |             |              |
|                         | <i>diff</i> | <i>lwr</i> | <i>upr</i>  | <i>p_adj</i> |
| 3:23-0:23               | 0.07241     | -0.18382   | 0.32863     | 0.98258      |
| 5:23-0:23               | 0.11693     | -0.13929   | 0.37316     | 0.81461      |
| 10:23-0:23              | -0.15107    | -0.40729   | 0.10516     | 0.55665      |
| 0:60-0:23               | 0.19315     | -0.02986   | 0.41617     | 0.12957      |
| 3:60-0:23               | 0.28419     | -0.01501   | 0.5834      | 0.07249      |
| 5:60-0:23               | -0.05928    | -0.31551   | 0.19695     | 0.99463      |
| 10:60-0:23              | -0.16328    | -0.41951   | 0.09295     | 0.45983      |
| 5:23-3:23               | 0.04453     | -0.22309   | 0.31215     | 0.99933      |
| 10:23-3:23              | -0.22347    | -0.49109   | 0.04415     | 0.1585       |
| 0:60-3:23               | 0.12075     | -0.11527   | 0.35677     | 0.71518      |
| 3:60-3:23               | 0.21179     | -0.09723   | 0.52081     | 0.36882      |
| 5:60-3:23               | -0.13169    | -0.39931   | 0.13593     | 0.75223      |
| 10:60-3:23              | -0.23569    | -0.50331   | 0.03193     | 0.11756      |
| 10:23-5:23              | -0.268      | -0.53562   | -3.79719E-4 | 0.04947      |
| 0:60-5:23               | 0.07622     | -0.1598    | 0.31224     | 0.9637       |
| 3:60-5:23               | 0.16726     | -0.14176   | 0.47628     | 0.6562       |
| 5:60-5:23               | -0.17621    | -0.44383   | 0.09141     | 0.41865      |
| 10:60-5:23              | -0.28021    | -0.54783   | -0.01259    | 0.03481      |
| 0:60-10:23              | 0.34422     | 0.1082     | 0.58024     | 0.001        |
| 3:60-10:23              | 0.43526     | 0.12624    | 0.74428     | 0.00158      |
| 5:60-10:23              | 0.09179     | -0.17583   | 0.35941     | 0.95029      |
| 10:60-10:23             | -0.01221    | -0.27983   | 0.25541     | 1            |
| 3:60-0:60               | 0.09104     | -0.19106   | 0.37314     | 0.96383      |
| 5:60-0:60               | -0.25243    | -0.48845   | -0.01642    | 0.02915      |
| 10:60-0:60              | -0.35643    | -0.59245   | -0.12042    | 6.226E-4     |
| 5:60-3:60               | -0.34347    | -0.65249   | -0.03445    | 0.0208       |
| 10:60-3:60              | -0.44747    | -0.75649   | -0.13845    | 0.0011       |
| 10:60-5:60              | -0.104      | -0.37162   | 0.16362     | 0.90813      |
